# Supplementary material
Source: PubMed Central journal article supplement (PMC3269557)
Supplement: NIHMS324842-supplement-01.pdf [file NIHMS324842-supplement-01.pdf]

Supplementary Figure S1 - 64 electrode ERP montage of the selective attention, delayed-recognition task

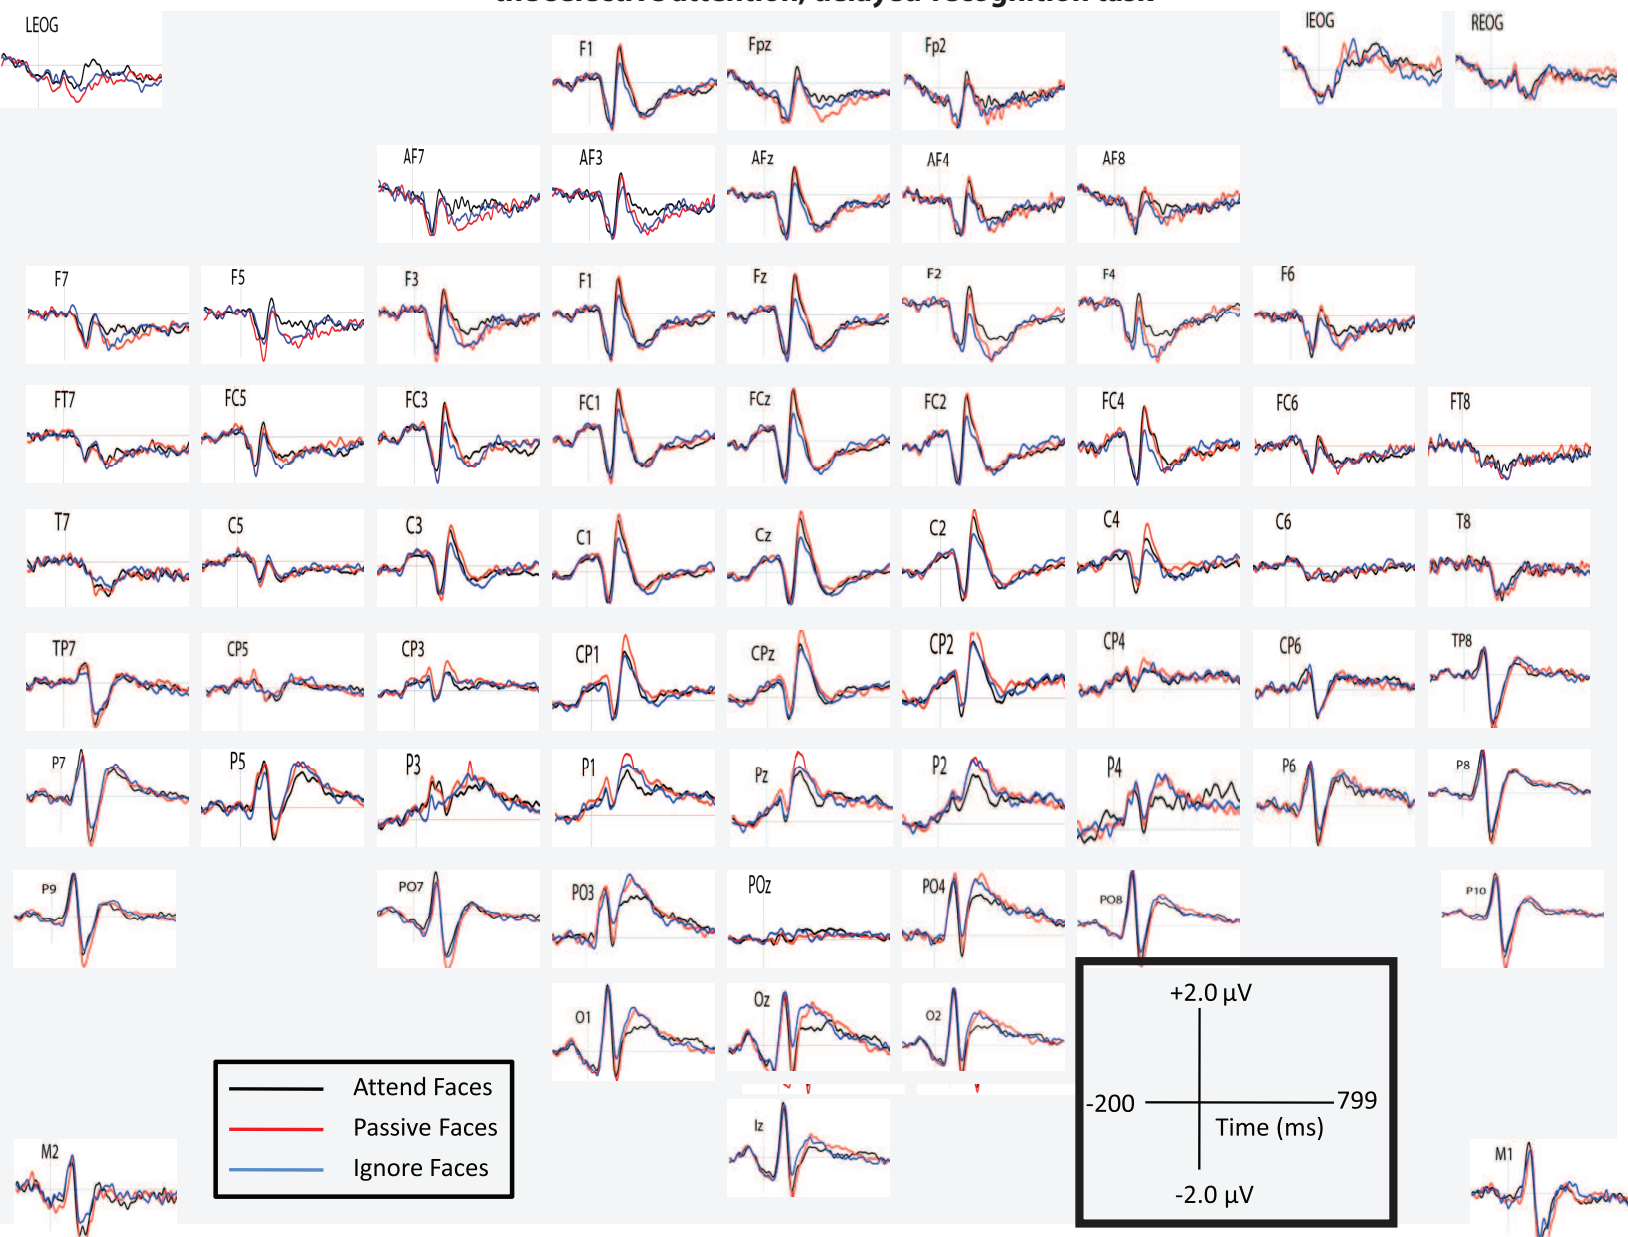

Supplementary Figure S2 - 64 electrode ERP montage of the stop signal task

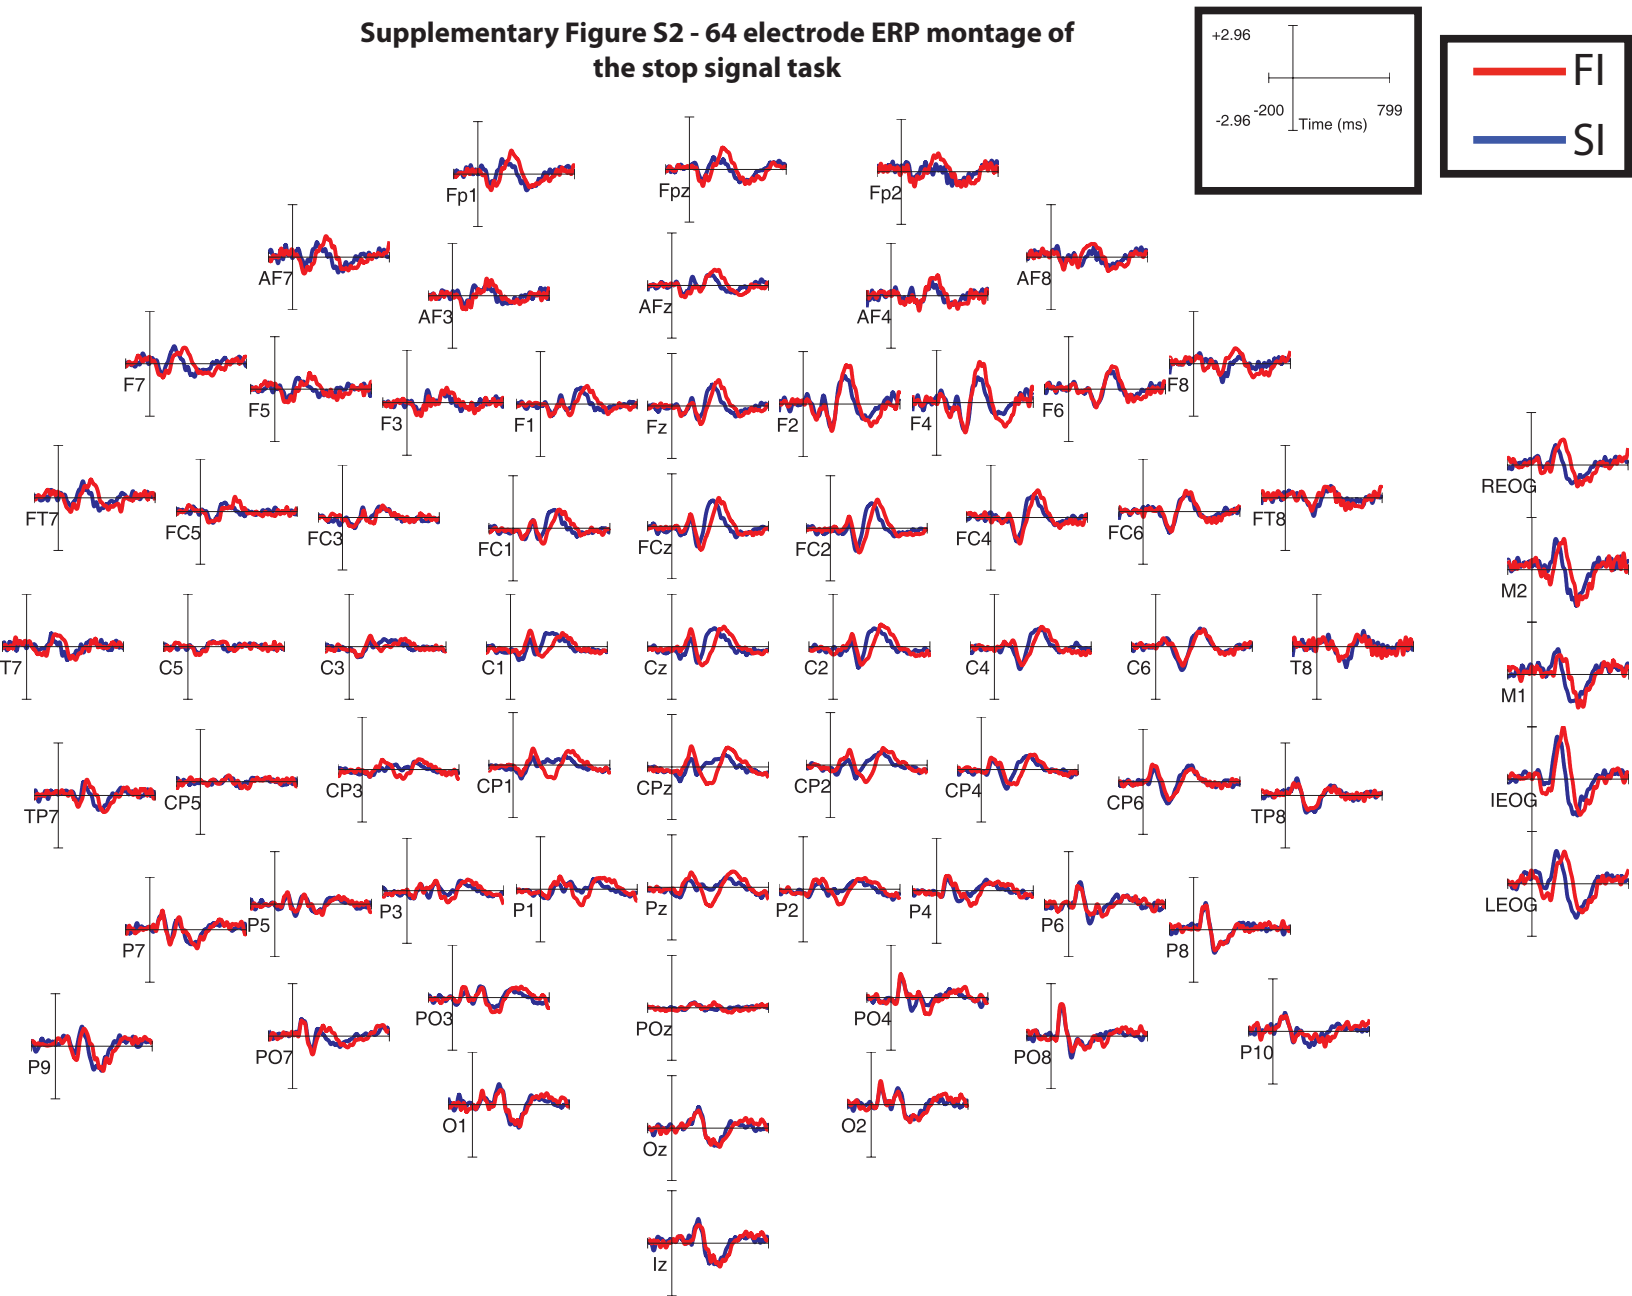

Supplementary Table S1 - Neuropsychological and Cognitive Metrics.

| Neuropsychological tests: Mean (S.E.) | Standard Deviation from Normative Values (S.E.) |             |
|---------------------------------------|-------------------------------------------------|-------------|
| CVLT: Trial 5 recall                  | 12.9 (.7)                                       | 0.90 (.23)  |
| CVLT: Short delay free recall         | 11.5 (.9)                                       | 1.05 (.25)  |
| CVLT: Short delay cued recall         | 12.7 (.6)                                       | 0.90 (.21)  |
| CVLT: Long delay free recall          | 12.3 (.8)                                       | 1.08 (.24)  |
| CVLT: Long delay cued recall          | 12.8 (.7)                                       | 0.95 (.21)  |
| Memory for modified Rey               | 12.1 (.6)                                       | 0.18 (.18)  |
| WAIS-R: backward digit span           | 5.8 (.3)                                        | 1.09 (.21)  |
| WAIS-R: digit symbol                  | 51.6 (2.3)                                      | 0.28 (.17)  |
| Trail making test: A                  | 29.0s (2.2)                                     | 0.31 (.16)  |
| Trail making test: B                  | 81.8s (7.0)                                     | 0.21 (.10)  |
| Stroop: Color naming                  | 84.1 (3.0)                                      | 0.20 (.35)  |
| Stroop: Color-word naming             | 49.9 (2.7)                                      | -0.11 (.17) |
| Semantic fluency                      | 21.3 (1.5)                                      | 0.21 (.31)  |
| Phonemic fluency                      | 13.8 (1.0)                                      | -0.40 (.16) |
| Calculation ability (out of 5)        | 4.9 (.1)                                        | n/a*        |
| Dysexecutive Questionnaire (DEX)      | 12.5 (1.9)                                      | -           |

  

| Tests of Cognitive Impairment: Mean (S.E.) | Standard Deviation from Normative Values (S.E.) |           |
|--------------------------------------------|-------------------------------------------------|-----------|
| Mini-mental state examination              | 29.4 (.3)                                       | .83 (.22) |
| Geriatric depression scale                 | 2.9 (.7)                                        | n/a*      |

\* This measure does not have published normative measures
